# Supplementary material for: Preparation of chromophore-based polymer films with enhanced lithium ion transport by an electrospinning method
Source: Royal Society of Chemistry journal article supplement (doi:10.1039/d0ta11838a), 2021-01-01
Supplement: d0ta11838a1.pdf [file d0ta11838a1.pdf]

# Supporting Information

## **Preparation of chromophore-based polymer films with enhanced lithium ion transport by electrospinning method**

Lifeng Gao,<sup>‡ab</sup> Fanghui Zhao,<sup>‡c</sup> Wei Li,<sup>a</sup> Siqu Zhan,<sup>ab</sup> Lianfeng Duan,<sup>b</sup> Shiwei Wang<sup>\*ab</sup> and Mingyao Zhang<sup>a</sup>

<sup>a</sup> School of Chemical Engineering, Changchun University of Technology, Changchun 130012, P. R. China, Email: [wangshiwei@ccut.edu.cn](mailto:wangshiwei@ccut.edu.cn).

<sup>b</sup> Advanced Institute of Materials Science, Changchun University of Technology, Changchun, 130012, P. R. China.

<sup>c</sup> Key Laboratory of Advanced Structural Materials, Ministry of Education & Advanced Institute of Materials Science, Changchun University of Technology, Changchun 130012, P. R. China.

<sup>‡</sup> The contributions of these authors are equal

\*Corresponding author

**Materials:**

PVDF ( $M_w=275000 \text{ g}\cdot\text{mol}^{-1}$ ) and N, N-dimethylacetamide (DMAC, analytically pure  $\geq 99.5\%$ ) were purchased from Sigma-Aldrich Company.  $\text{LiPF}_6$  was used as a commercially available electrolyte for lithium-ion battery.  $\text{DR}_1$  and  $\text{DO}_{25}$  were purchased from J&K Scientific Technology Co. Ltd. All as-prepared materials were used without any further purification.

**Fabrication of PVDF/ $\text{DR}_1$  Membranes:**

PVDF powder was dissolved in DMAC/acetone (wt/wt=7:3) solvent by stirring at  $50^\circ\text{C}$ , then the PVDF/ $\text{DR}_1$  mixed solutions can be obtained by adding different proportions of  $\text{DR}_1$  into the above solution under stirring. PVDF/ $\text{DR}_1$  fiber film was constructed by electrospinning technique with different voltage, then dried at  $60^\circ\text{C}$  for 24h in vacuum drying oven. The flowing speed was  $0.8 \text{ ml h}^{-1}$ , and the syringe tip is 18 cm from the base.

**Characterization:**

The morphology of samples was observed by using a scanning electron microscope (SEM). Raman spectroscopy with 532 nm excitation wavelength is operated at 0.01 mW and acquisition time 10s to analysis the influence on the membranes under applied

voltages from 100 to 2000 cm<sup>-1</sup>.

Surface contact angle test was taken in order to evaluate the wettability of different separators. Note that the water contact angle data is the average of the measurements at different locations on the surface of a film.

The ion conductivity was determined by testing electrochemical impedance spectroscopy (EIS) using CHI600E electrochemical workstation. In the EIS method, the frequency range was from 0.1 Hz to 10<sup>6</sup>Hz with a alternating current amplitude of 5 mV at ambient temperature. The ionic conductivity was calculated by using the equation:

$$\sigma = \frac{d}{R_b S} \quad (3)$$

Where  $\sigma$  is the ionic conductivity then  $R_b$  represents the bulk resistance. The  $d$  denotes the thickness of the membranes and  $S$  is the effective contact area of the specimen.

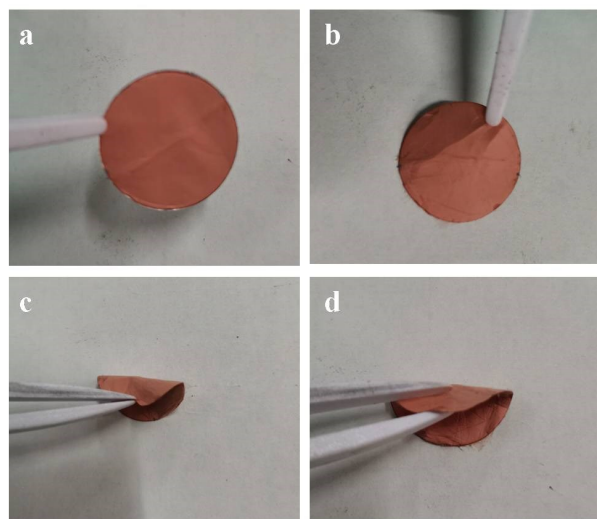

**Fig. S1** Photographs of the PVDF/DR1 electrospinning fiber membranes.

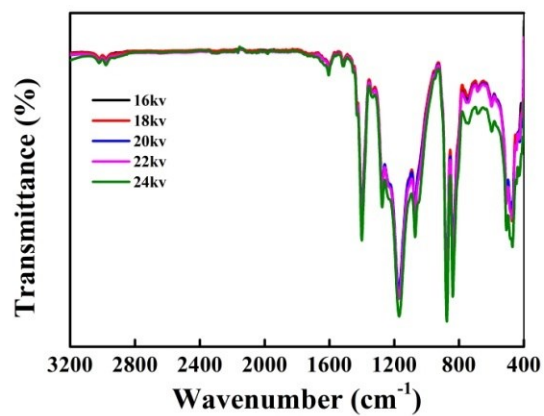

**Fig. S2** Infrared spectra of the PVDF/DR1 fiber membranes constructed under different electrospinning voltage.

**Table 1.** The thickness and Li<sup>+</sup> conductivity of the PVDF/DR1 film constructed under different voltages.

| V (kV) | d (μm) | σ (ms.cm <sup>-1</sup> ) |
|--------|--------|--------------------------|
| 16     | 108    | 20.79                    |
| 18     | 205    | 37.80                    |
| 20     | 360    | 38.01                    |
| 22     | 225    | 40.63                    |
| 24     | 266    | 56.25                    |
